# Supplementary material
Source: MDPI journal article supplement (https://www.mdpi.com/2071-1050/8/3/202)
Supplement: s1 [file s1]

# Supplementary Materials: Sustainability within the Academic EcoHealth Literature: Existing Engagement and Future Prospects

Aryn Lisitza and Gregor Wolbring

**Table S1.** Total hit count and number of articles for all sustainability terms and phrases we found in the n = 647 articles as well as sustainability terms that were present or not in the Brundtland report and the 2015 United Nations outcome document “Transforming Our World: The 2030 Agenda for Sustainable Development” [1,2].

| No. | Term                                                     | Hit Counts<br>(ATLAS-ti7©) | Number of Articles<br>(ATLAS-ti7©)<br>(n = 647) |
|-----|----------------------------------------------------------|----------------------------|-------------------------------------------------|
| 1   | sustain                                                  | 2313                       | 305                                             |
| 2   | sustainable                                              | 985                        | 207                                             |
| 3   | sustainability                                           | 1002                       | 176                                             |
| 4   | unsustainable                                            | 40                         | 32                                              |
| 5   | sustainable development                                  | 105                        | 28                                              |
| 6   | ecosystem sustainability and sustainable ecosystems      | 34                         | 20                                              |
| 7   | environmental sustainability   environmental sustainable | 23                         | 16                                              |
| 8   | sustainable use                                          | 25                         | 15                                              |
| 9   | health and sustainability                                | 26                         | 13                                              |
| 10  | sustainable management                                   | 14                         | 11                                              |
| 11  | long-term sustainability   longer-term sustainability    | 12                         | 10                                              |
| 12  | sustainable health                                       | 11                         | 10                                              |
| 13  | ecological sustainability/ecological sustainable         | 13                         | 10                                              |
| 14  | sustainable solutions                                    | 12                         | 9                                               |
| 15  | sustainable future                                       | 8                          | 6                                               |
| 16  | Sustainable food                                         | 17                         | 5                                               |
| 17  | Social sustainability                                    | 11                         | 5                                               |
| 18  | sustainable resources                                    | 8                          | 5                                               |
| 19  | sustainable manner                                       | 6                          | 5                                               |
| 20  | sustainability assessment                                | 7                          | 4                                               |
| 21  | sustainable development goals                            | 7                          | 4                                               |
| 22  | sustainability challenges                                | 6                          | 4                                               |
| 23  | sustainable energy                                       | 5                          | 4                                               |
| 24  | sustainable change                                       | 4                          | 4                                               |
| 25  | sustainable practice*                                    | 4                          | 4                                               |
| 26  | sustainable livelihood                                   | 17                         | 4                                               |
| 27  | sustainability science                                   | 13                         | 3                                               |
| 28  | framework for sustain*                                   | 4                          | 3                                               |
| 29  | sustainable cities                                       | 4                          | 3                                               |
| 30  | sustainability indicators                                | 4                          | 3                                               |
| 31  | sustainability issues                                    | 4                          | 3                                               |
| 32  | sustainable ways                                         | 3                          | 3                                               |
| 33  | sustainable strategy                                     | 3                          | 3                                               |
| 34  | sustain life                                             | 3                          | 3                                               |
| 35  | sustainable production                                   | 3                          | 3                                               |
| 36  | sustainable economic growth                              | 3                          | 3                                               |
| 37  | sustainable aquaculture                                  | 6                          | 2                                               |
| 38  | sustainability goal*                                     | 5                          | 2                                               |
| 39  | sustainable transportation                               | 5                          | 2                                               |
| 40  | sustainable society                                      | 3                          | 2                                               |

|    |                                                           |    |   |
|----|-----------------------------------------------------------|----|---|
| 41 | sustainability of food                                    | 2  | 2 |
| 42 | sustainable lifestyle                                     | 2  | 2 |
| 43 | sustainable capacity                                      | 2  | 2 |
| 44 | sustaining biodiversity                                   | 2  | 2 |
| 45 | level of sustainability                                   | 2  | 2 |
| 46 | regional sustainability                                   | 2  | 2 |
| 47 | locally sustainable                                       | 2  | 2 |
| 48 | sustainability of interventions                           | 2  | 2 |
| 49 | sustainability of vector control                          | 2  | 2 |
| 50 | sustainable outcomes                                      | 2  | 2 |
| 51 | sustainable relationship                                  | 2  | 2 |
| 52 | sustainable crop                                          | 2  | 2 |
| 53 | sustainably managing                                      | 3  | 2 |
| 54 | sustainable practices                                     | 5  | 2 |
| 55 | food system sustainability                                | 10 | 1 |
| 56 | sustainable human population   sustain human populations  | 9  | 1 |
| 57 | food production sustainability                            | 7  | 1 |
| 58 | sustainable salmon farming                                | 4  | 1 |
| 59 | sustainable dengue control                                | 4  | 1 |
| 60 | sustainable water management                              | 3  | 1 |
| 61 | sustained decline                                         | 3  | 1 |
| 62 | sustainable livestock                                     | 2  | 1 |
| 63 | sustainable rural development                             | 2  | 1 |
| 64 | quantifying sustainability                                | 2  | 1 |
| 65 | elements of sustainability                                | 2  | 1 |
| 66 | sustainability purpose                                    | 2  | 1 |
| 67 | sustainability of civilisation                            | 2  | 1 |
| 68 | ecosocial system sustainability                           | 2  | 1 |
| 69 | sustainable travel                                        | 2  | 1 |
| 70 | sustainable communities                                   | 1  | 1 |
| 71 | sustainable health gains                                  | 1  | 1 |
| 72 | sustainable wildlife population                           | 1  | 1 |
| 73 | sustaining community relations                            | 1  | 1 |
| 74 | sustaining productivity                                   | 1  | 1 |
| 75 | sustaining transformation                                 | 1  | 1 |
| 76 | urban sustainability                                      | 1  | 1 |
| 77 | water for sustainability                                  | 1  | 1 |
| 78 | sustained tribal cultures   tribal cultures are sustained | 1  | 1 |
| 79 | sustaining global health                                  | 1  | 1 |
| 80 | sustainable farming                                       | 1  | 1 |
| 81 | sustain quality of life                                   | 1  | 1 |
| 82 | sustain sanitation                                        | 1  | 1 |
| 83 | sustainable tourism                                       | 1  | 1 |
| 84 | sustainable urban design                                  | 1  | 1 |
| 85 | sustainable urban areas                                   | 1  | 1 |
| 86 | marine sustainability                                     | 1  | 1 |
| 87 | program sustainability                                    | 1  | 1 |
| 88 | sustaining the eco-centric self                           | 1  | 1 |
| 89 | sustainable use of biodiversity                           | 1  | 1 |
| 90 | sustainable supply                                        | 1  | 1 |
| 91 | sustainable disease prevention                            | 1  | 1 |
| 92 | sustainable resource use                                  | 1  | 1 |
| 93 | education for sustainability                              | 1  | 1 |
| 94 | sustainability impact statement                           | 1  | 1 |
| 95 | sustainable well-being                                    | 1  | 1 |
| 96 | sustainable urban environment*                            | 1  | 1 |
| 97 | sustainable global health   global health sustainability  | 1  | 1 |
| 98 | sustainable food supply                                   | 1  | 1 |

|     |                                                                                      |   |   |
|-----|--------------------------------------------------------------------------------------|---|---|
| 99  | sustainable implementation                                                           | 1 | 1 |
| 100 | sustainability of vital ecosystems                                                   | 1 | 1 |
| 101 | sustainability of future generations                                                 | 1 | 1 |
| 102 | sustained forms of behaviour   sustained behaviour                                   | 1 | 1 |
| 103 | agro-ecological sustainability                                                       | 1 | 1 |
| 104 | planetary sustainability                                                             | 1 | 1 |
| 105 | biological sustainability                                                            | 1 | 1 |
| 106 | sustaining activities                                                                | 1 | 1 |
| 107 | laboratory for sustainability                                                        | 1 | 1 |
| 108 | core concepts of sustain*                                                            | 1 | 1 |
| 109 | contemporary science of sustain*                                                     | 1 | 1 |
| 110 | sustainable sanitation                                                               | 1 | 1 |
| 111 | sustainability of the biosphere                                                      | 1 | 1 |
| 112 | sustainability debate*                                                               | 1 | 1 |
| 113 | sustainable human goals                                                              | 1 | 1 |
| 114 | sustainable modes of operation                                                       | 1 | 1 |
| 115 | sustainability of local projects                                                     | 1 | 1 |
| 116 | sustainability discourse                                                             | 1 | 1 |
| 117 | sustainable consumption                                                              | 1 | 1 |
| 118 | sustainable interactions                                                             | 1 | 1 |
| 119 | live sustainability                                                                  | 1 | 1 |
| 120 | sustainability concerns                                                              | 1 | 1 |
| 121 | social determinants of sustainability                                                | 1 | 1 |
| 122 | sustained employment                                                                 | 1 | 1 |
| 123 | sustainable growth                                                                   | 1 | 1 |
| 124 | sustainable economic development                                                     | 1 | 1 |
| 125 | sustainable activities                                                               | 1 | 1 |
| 126 | sustainability of water systems   sustainability of water supplies                   | 1 | 1 |
| 127 | sustainability studies                                                               | 1 | 1 |
| 128 | sustainable watershed management                                                     | 1 | 1 |
| 129 | sustainability variables                                                             | 1 | 1 |
| 130 | financial sustainability                                                             | 1 | 1 |
| 131 | sustainable hunting programmes                                                       | 1 | 1 |
| 132 | sustainable water consumption                                                        | 1 | 1 |
| 133 | sustainable indigenous future*                                                       | 1 | 1 |
| 134 | sustainability-based health management system                                        | 1 | 1 |
| 135 | threats to sustainability   sustainability threats                                   | 1 | 1 |
| 136 | sustainability of ecosystem services                                                 | 1 | 1 |
| 137 | sustained poultry production                                                         | 1 | 1 |
| 138 | sustaining human population   sustain increasing human population                    | 1 | 1 |
| 139 | sustainable greenhouse gas emissions   sustainable level of greenhouse gas emissions | 1 | 1 |
| 140 | global sustainability agenda                                                         | 1 | 1 |
| 141 | sustained artificial environments                                                    | 1 | 1 |
| 142 | sustaining livelihood   sustaining the livelihood                                    | 1 | 1 |
| 143 | sustainability curriculum program                                                    | 1 | 1 |
| 144 | sustainable participatory process                                                    | 1 | 1 |
| 145 | sustainable fire management practices                                                | 1 | 1 |
| 146 | energy sustainability indices                                                        | 1 | 1 |
| 147 | sustain social choices                                                               | 1 | 1 |
| 148 | sustain military operations                                                          | 1 | 1 |
| 149 | sustainability governance                                                            | 1 | 1 |
| 150 | sustainable human-ecosystem dynamic                                                  | 1 | 1 |
| 151 | sustainability of bat hunting                                                        | 1 | 1 |
| 152 | sustainability of process                                                            | 1 | 1 |
| 153 | sustainable techniques                                                               | 1 | 1 |
| 154 | sustainable natural resources model                                                  | 1 | 1 |
| 155 | sustainable agricultural practice                                                    | 1 | 1 |

|     |                                                 |   |   |
|-----|-------------------------------------------------|---|---|
| 156 | sustainable alternatives                        | 1 | 1 |
| 157 | sustainable benefits                            | 1 | 1 |
| 158 | sustainable levels of health                    | 1 | 1 |
| 159 | sustainability activists                        | 1 | 1 |
| 160 | sustainability curriculum                       | 1 | 1 |
| 161 | Sustainable path                                | 1 | 1 |
| 162 | Sustainable energy                              | 1 | 1 |
| 163 | Sustainable lifestyle                           | 1 | 1 |
| 164 | sustained resources                             | 0 | 0 |
| 165 | sustainable control of disease                  | 0 | 0 |
| 166 | sustainable design                              | 0 | 0 |
| 167 | sustaining programs                             | 0 | 0 |
| 168 | sustainable landscaping                         | 0 | 0 |
| 169 | sustainable healthcare practice                 | 0 | 0 |
| 170 | sustained horizontal integration                | 0 | 0 |
| 171 | sustainability of fisher*   sustainable fisher* | 0 | 0 |
| 172 | intervention sustainability                     | 0 | 0 |
| 173 | sustainability of professional curricula        | 0 | 0 |
| 174 | sustainable competition                         | 0 | 0 |
| 175 | sustainable construction                        | 0 | 0 |
| 176 | sustained income                                | 0 | 0 |
| 177 | sustainable health programs                     | 0 | 0 |
| 178 | sustainability management system                | 0 | 0 |
| 179 | sustained vertical integration                  | 0 | 0 |
| 180 | model of sustainability                         | 0 | 0 |
| 181 | sustainability of species                       | 0 | 0 |
| 182 | sustain economic activity                       | 0 | 0 |
| 183 | sustaining farm incomes                         | 0 | 0 |
| 184 | sustainable fishery                             | 0 | 0 |
| 185 | sustainable industrial development              | 0 | 0 |
| 186 | sustainable transport systems                   | 0 | 0 |
| 187 | sustainable urban development                   | 0 | 0 |
| 188 | sustainable industrialization                   | 0 | 0 |
| 189 | sustainable use of terrestrial ecosystems       | 0 | 0 |
| 190 | sustainable management of water and sanitation  | 0 | 0 |
| 191 | sustainable withdrawals                         | 0 | 0 |
| 192 | sustain income growth                           | 0 | 0 |
| 193 | sustainable urbanization                        | 0 | 0 |
| 194 | sustainable human settlement planning           | 0 | 0 |
| 195 | sustainability information                      | 0 | 0 |
| 196 | sustainable livelihood opportunities            | 0 | 0 |
| 197 | debt sustainability                             | 0 | 0 |
| 198 | sustainable debt levels                         | 0 | 0 |

## Reference

1. World Commission on Environment and Development (WCED). *Report of the World Commission on Environment and Development: Our Common Future*; WCED: London, UK, 1987.
2. United Nation. Transforming Our World: The 2030 Agenda for Sustainable Development. Available online: <https://sustainabledevelopment.un.org/post2015/transformingourworld> (accessed on 3 February 2016).
